# Supplementary material for: Morphology and molecular phylogeny of three new deep-sea species of Chrysogorgia (Cnidaria, Octocorallia) from seamounts in the tropical Western Pacific Ocean
Source: PeerJ. 2020 Mar 25;8:e8832. doi: 10.7717/peerj.8832 (PMC7102507; doi:10.7717/peerj.8832)
Supplement: Supplemental Information 1 [file peerj-08-8832-s001.xlsx]

## Sheet: Sheet1
		1	2	3	4	5	6	7	8	9	10	11	12	13
1	Chrysogorgia gracilis sp. nov. MN510472	-
2	C. dendritica sp. nov. MN510469	0.0097	-
3	C. fragilis sp. nov. MN510470	0.0113	0.0016	-
4	C. abludo GQ180139, JN227999	0.0097	0	0.0016	0
5	C. tricaulis JN227998, JN227990, JN227991, GQ180123-31, EU268056	0.0065	0.0097	0.0081	0.0097	0
6	C. artospira GQ180132-5, GQ353317	0.0048	0.0081	0.0065	0.0081	0.0016	0
7	C. pinnata JN227988	0.0048	0.0081	0.0065	0.0081	0.0016	0	-
8	C. averta KC788265, GQ180136	0.0081	0.0113	0.0097	0.0113	0.0048	0.0032	0.0032	0
9	C. ramificans MK431863	0.0113	0.0145	0.0129	0.0145	0.0081	0.0065	0.0065	0.0097	-
10	C. monticola JN227989	0.0113	0.0145	0.0129	0.0145	0.0081	0.0065	0.0065	0.0097	0.0032	-
11	C. binata MK431862	0.021	0.0242	0.0226	0.0242	0.0177	0.0161	0.0161	0.0194	0.0226	0.0226	-
12	C. cf. stellata JN227920	0.0194	0.0226	0.021	0.0226	0.0161	0.0145	0.0145	0.0177	0.021	0.021	0.0016	-
13	C. chryseis JN227992, DQ297421	0.021	0.0242	0.0226	0.0242	0.0177	0.0161	0.0161	0.0194	0.0226	0.0226	0.0048	0.0032	0
